# Supplementary material for: Atopic dermatitis disease registry in Japanese adult patients with moderate to severe atopic dermatitis (ADDRESS‐J): Baseline characteristics, treatment history and disease burden
Source: PubMed Central journal article supplement — J Dermatol. 2019 Feb 13;46(4):290–300. doi: 10.1111/1346-8138.14787 (PMC6594225; doi:10.1111/1346-8138.14787), 2019-02-13
Supplement: JDE-46-290-s001.pdf [file JDE-46-290-s001.pdf]

**The Atopic Dermatitis Disease Registry in Japanese Adult Patients with Moderate-to-Severe Atopic Dermatitis (ADDRESS-J): Baseline Characteristics, Treatment History, and Disease Burden**

**SUPPORTING INFORMATION**

**Table S1. ADDRESS-J study investigators.**

| <b>Affiliation</b>                                                                                 | <b>Investigator</b> |
|----------------------------------------------------------------------------------------------------|---------------------|
| Department of Dermatology, Kyoto Prefectural University of Medicine                                | Norito Katoh        |
| Department of Dermatology, Nippon Medical School                                                   | Hidehisa Saeki      |
| Department of Dermatology, Osaka Habikino Medical Center                                           | Yoko Kataoka        |
| Department of Dermatology, Tokyo Teishin Hospital                                                  | Takafumi Etoh       |
| Sawada Dermatology Clinic                                                                          | Shun'ichi Sawada    |
| Mildix Skin Clinic                                                                                 | Minako Yasumoto     |
| Mildix Skin Clinic, Yokohama Medical Center                                                        | Yoshiyuki Murakami  |
| Okuda Dermatology Clinic                                                                           | Tomoki Okuda        |
| Iidabashi Skin Clinic                                                                              | Shiomi Kawano       |
| Clinique Dermatologique Todoroki                                                                   | Yoko Todoroki       |
| Queen's Square Medical Center                                                                      | Tokuya Omi          |
| Itoh Skin Clinic                                                                                   | Yusei Itoh          |
| Maruyama Hifuka Clinic                                                                             | Ryuji Maruyama      |
| Kohoku Dermatology                                                                                 | Hiroshi Ikeda       |
| Igarashi Dermatology Clinic                                                                        | Masaru Igarashi     |
| Tsukuda River-City Dermatology Clinic                                                              | Katsumi Tanito      |
| Asai Dermatology Clinic                                                                            | Toshiya Asai        |
| M&M Skincare Clinic                                                                                | Mineko Suzuki       |
| emi Skin Clinic Shoto                                                                              | Emi Nakazaki        |
| Kinoshita Skin Clinic                                                                              | Miwako Kinoshita    |
| Mizutani Dermatology Clinic                                                                        | Haruko Mizutani     |
| Hamada Clinic                                                                                      | Kazutoshi Hamada    |
| Chitofuna Dermatology Clinic                                                                       | Toshiya Ebata       |
| Department of Dermatology, Graduate School of Biomedical and Health Sciences, Hiroshima University | Michihiro Hide      |
| Sugai Dermatology Park Side Clinic                                                                 | Junichi Sugai       |
| Department of Dermatology, Tokyo Women's Medical University                                        | Naoko Ishiguro      |
| Department of Dermatology, The University of Tokyo Graduate School of Medicine                     | Tomomitsu Miyagaki  |
| Department of Dermatology, Osaka University Graduate School of Medicine                            | Saori Itoi-Ochi     |
| Department of Dermatology, Faculty of Medicine, University of Yamanashi                            | Hiroshi Mitsui      |
| Department of Dermatology, Dokkyo Medical University Saitama Medical Center                        | Kazumoto Katagiri   |

**Table S2. AD severity (IGA score) by type of study site.**

|                   |          | <b>Number (%)</b> |                              |                            |
|-------------------|----------|-------------------|------------------------------|----------------------------|
|                   |          | <b>All</b>        | <b>Moderate:<br/>IGA = 3</b> | <b>Severe:<br/>IGA = 4</b> |
|                   |          | 300 (100)         | 220 (100)                    | 80 (100)                   |
| <b>Study site</b> | Hospital | 137 (46)          | 80 (36)                      | 57 (71)                    |
|                   | Clinic   | 163 (54)          | 140 (64)                     | 23 (29)                    |

IGA, Investigator's global assessment.

**Table S3. Allergic comorbidities presented by AD onset and sex.**

| Comorbidity                                      | Number (%) |                  |                   |            |            |              |
|--------------------------------------------------|------------|------------------|-------------------|------------|------------|--------------|
|                                                  | Total      | AD onset         |                   |            | Sex        |              |
|                                                  |            | ≥ 0 to < 6 years | ≥ 6 to < 18 years | ≥ 18 years | Male n (%) | Female n (%) |
|                                                  | 187        | 53               | 60                | 182        | 118        |              |
| Allergic diseases (except for atopic dermatitis) | 149 (79.7) | 37 (69.8)        | 37 (61.7)         | 127 (69.8) | 96 (81.4)  |              |
| Allergic rhinitis                                | 108 (57.8) | 30 (56.6)        | 29 (48.3)         | 9 (4.9)    | 4 (3.4)    |              |
| Food allergy                                     | 53 (28.3)  | 7 (13.2)         | 6 (10.0)          | 7 (3.8)    | 2 (1.7)    |              |
| Allergic conjunctivitis                          | 42 (22.5)  | 15 (28.3)        | 14 (23.3)         | 3 (1.6)    | 6 (5.1)    |              |
| Asthma                                           | 35 (18.7)  | 8 (15.1)         | 12 (20.0)         | 37 (20.3)  | 20 (16.9)  |              |
| Allergic contact dermatitis                      | 22 (11.8)  | 4 (7.5)          | 3 (5.0)           | 1 (0.5)    | 0          |              |
| Hives                                            | 21 (11.2)  | 5 (9.4)          | 6 (10.0)          | 4 (2.2)    | 7 (5.9)    |              |
| Drug allergy                                     | 9 (4.8)    | 4 (7.5)          | 1 (1.7)           | 0          | 3 (2.5)    |              |
| Chronic sinusitis                                | 7 (3.7)    | 1 (1.9)          | 5 (8.3)           | 1 (0.5)    | 2 (1.7)    |              |
| Atopic keratoconjunctivitis                      | 5 (2.7)    | 0                | 3 (5.0)           | 3 (1.6)    | 0          |              |

AD, atopic dermatitis

**Table S4: Baseline biomarkers for AD.**

| <b>Characteristic</b>                               | <b>N</b> | <b>All</b>              | <b>n</b> | <b>Moderate: IGA = 3</b> | <b>n</b> | <b>Severe: IGA = 4</b>  |
|-----------------------------------------------------|----------|-------------------------|----------|--------------------------|----------|-------------------------|
| TARC (pg/mL; median [min, max])                     | 58       | 3489.0 [450, 58677]     | 19       | 1565.0 [590, 25750]      | 39       | 3943.0 [450, 58677]     |
| Eosinophils (10 <sup>9</sup> /L); median [min, max] | 35       | 0.880 [0.11, 3.54]      | 17       | 0.575 [0.11, 2.78]       | 18       | 1.062 [0.52, 3.54]      |
| IgE (IU/mL; median [min, max])                      | 58       | 7052.00 [45.0, 66200.0] | 21       | 1908.00 [59.0, 28587.0]  | 37       | 8772.00 [45.0, 66200.0] |
| LDH (IU/L; median [min, max])                       | 63       | 307.0 [193, 858]        | 23       | 275.0 [193, 422]         | 40       | 325.5 [193, 858]        |

LDH, lactate dehydrogenase; NRS, numerical rating scale; POEM, patient-oriented eczema measure; TARC, thymus- and activation-regulated chemokine.

Figure S1. Allergic comorbidities presented by AD onset.

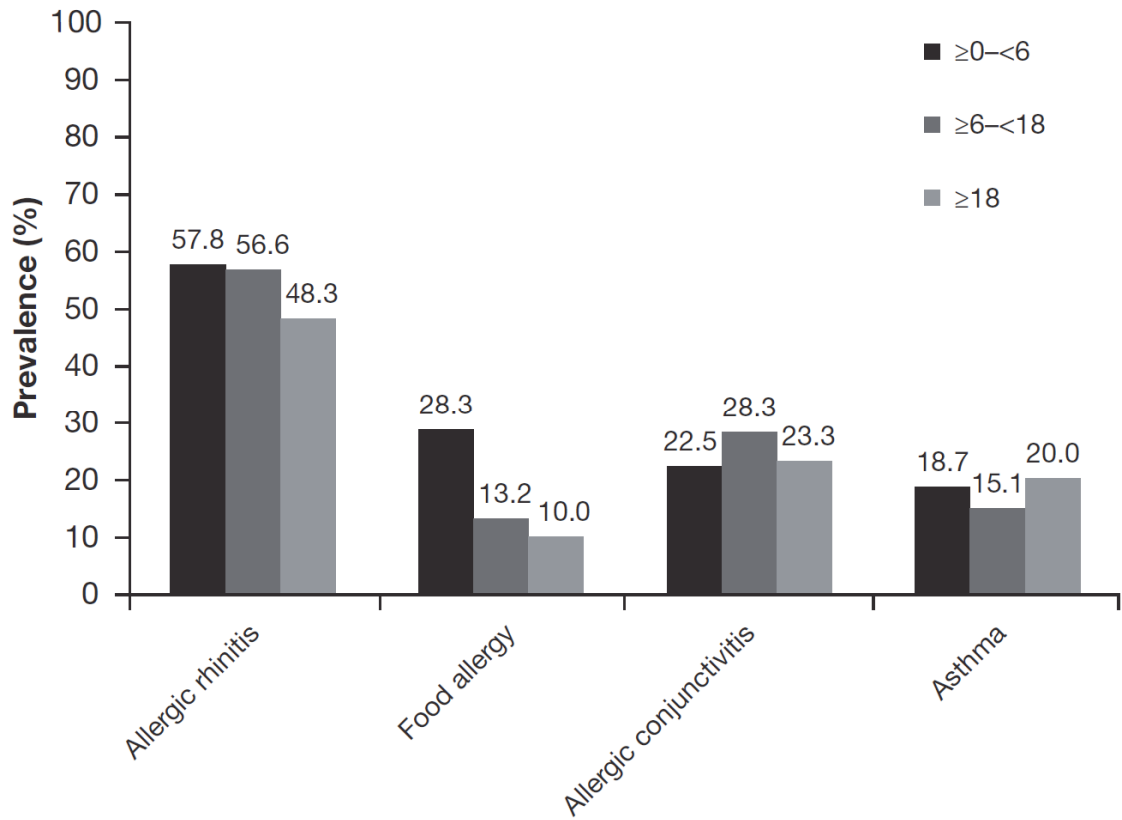

AD, atopic dermatitis

**Figure S2. Relationship between biomarkers and IGA (limited data).**

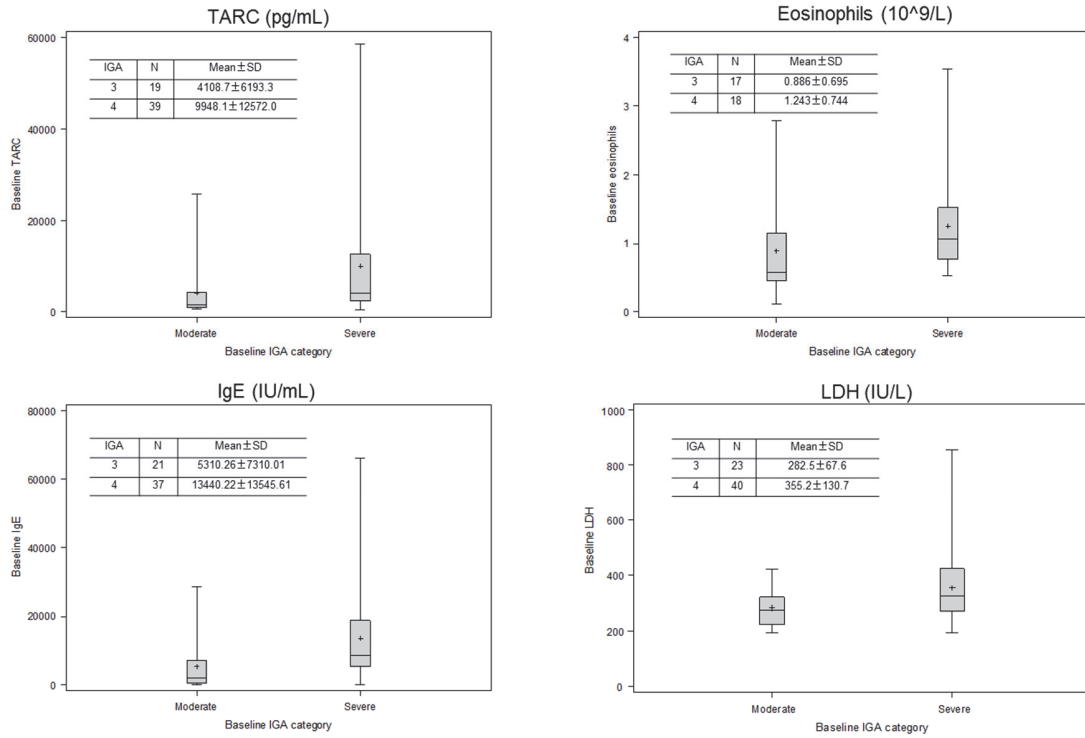

IGA, Investigator's Global Assessment; LDH, lactate dehydrogenase; TARC, thymus- and activation-regulated chemokine.
